# Supplementary material for: Biocompatible and multifunctional gold nanorods for effective photothermal therapy of oral squamous cell carcinoma
Source: Royal Society of Chemistry journal article supplement (doi:10.1039/c9tb00574a), 2019-01-01
Supplement: c9tb00574a1.pdf [file c9tb00574a1.pdf]

## Biocompatible and Multifunctional Gold Nanorods for Effective Photothermal Therapy of Oral Squamous Cell Carcinoma

Yu-Te Liao,<sup>a#</sup> Chia-Hung Liu,<sup>b-d#</sup> Yin Chin,<sup>c</sup> Sin-Yuan Chen,<sup>a</sup> Shing Hwa Liu,<sup>\*b,f,g</sup> Yih-Chih Hsu<sup>\*e</sup> and Kevin C.-W. Wu<sup>\*a</sup>

---

<sup>a.</sup> Department of Chemical Engineering, National Taiwan University, No. 1, Sec. 4, Roosevelt Road, Taipei 10617, Taiwan. E-mail: kevinwu@ntu.edu.tw

<sup>b.</sup> Institute of Toxicology, College of Medicine, National Taiwan University, Taipei, Taiwan. E-mail: shinghwaliu@ntu.edu.tw

<sup>c.</sup> Department of Urology, School of Medicine, College of Medicine, Taipei Medical University, Taipei, Taiwan.

<sup>d.</sup> Department of Urology, Shuang Ho Hospital, Taipei Medical University, New Taipei City, Taiwan.

<sup>e.</sup> Department of Bioscience, Department of Chemistry, Center for Nanotechnology, Center of Biomedical Technology, Center of Cancer Theranostics, Chung Yuan Choursistian University, Taoyuan, Taiwan. E-mail: ivyhsu@cycu.edu.tw

<sup>f.</sup> Department of Medical Research, China Medical University Hospital, China Medical University, Taichung, Taiwan.

<sup>g.</sup> Department of Pediatrics, College of Medicine, National Taiwan University, Taipei, Taiwan.

---

# The first two authors contribute this work equally

\* Corresponding authors

Keywords: alginate • gold nanorods • photothermal therapy • cell targeting • oral squamous cell carcinoma

## Calculation

### *Assumption:*

The diameter of GNRs is 11.1 nm and the length of GNRs is 48.3 nm. The length of a gold atom is 144 pm the area of a gold atom is  $2.0736 \times 10^{-20} \text{ m}^2$ . The density of gold is  $19.3 \text{ g/cm}^3$ . Totally  $1 \times 10^{-8} \text{ mol}$  of GNRs are coated with X mg of alginate.

### *Calculation:*

The volume of a GNR is  $(11.1 \times 10^{-9})^2 \times 3.14 \times 48.3 \times 10^{-9} = 1.8686 \times 10^{-23} \text{ m}^3$  and the surface area of a GNR is  $11.1 \times 10^{-9} \times 3.14 \times 48.3 \times 10^{-9} + (11.1 \times 10^{-9})^2 \times 3.14 / 4 = 1.876 \times 10^{-15} \text{ m}^2$ .

The weight of a GNR is  $1.8686 \times 10^{-23} \times 1.93 \times 10^7 = 3.606 \times 10^{-16} \text{ g}$

The number of GNR in a batch is  $1.95 \times 10^{-8} / 3.606 \times 10^{-16} = 5.407 \times 10^9$  rod in a batch

The number of gold atom on the surface of a GNR is  $1.876 \times 10^{-15} / 2.0736 \times 10^{-20} = 9.050 \times 10^4$  atoms and total number is  $9.050 \times 10^4 \times 5.407 \times 10^9 = 4.893 \times 10^{14}$  atoms =  $8.128 \times 10^{-10} \text{ mol}$

**Table S1** Quantification of thiol on cysteine modified alginate.

| Alginate (mol) <sup>#</sup> | Cysteine (mol) | EDC (mol) | Thiol bond ( $\mu\text{mol/g Alg}$ ) |
|-----------------------------|----------------|-----------|--------------------------------------|
| 1                           | 0.5            | 10        | 143.7 $\pm$ 15.0                     |
| 1                           | 1              | 10        | 268.8 $\pm$ 12.2                     |
| 1                           | 1.5            | 10        | 280.4 $\pm$ 24.3                     |
| 1                           | 1              | -         | 12.9 $\pm$ 0.64                      |

<sup>#</sup>: Molecular weight used here is the weight of an alginate unit ( $\beta$ -D-mannuronate or a  $\alpha$ -L-guluronate). One mole of alginate is 176 g.

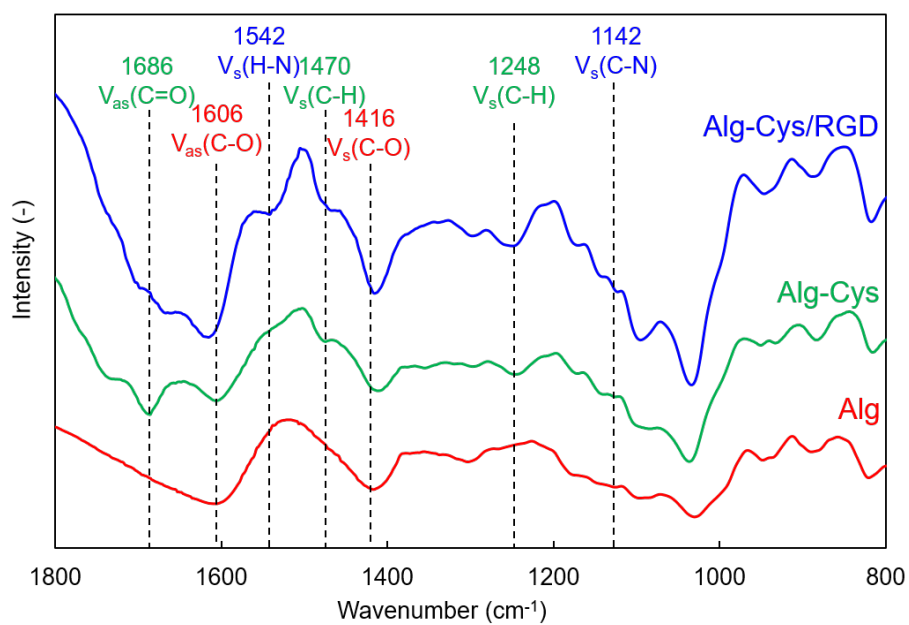

**Figure S1.** FTIR spectrum of cysteine and RGD peptide modified alginate.

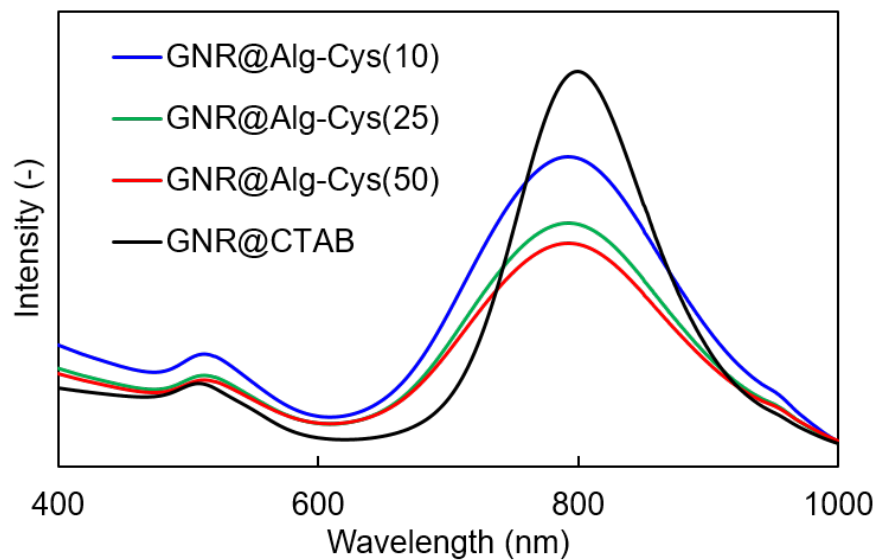

**Figure S2.** UV-visible absorption spectrum of GNR@Alg-Cys(X). X represents the amount (mg) of cysteine modified alginate used for replacing CTAB on 2  $\mu$ g of GNR@CTAB.

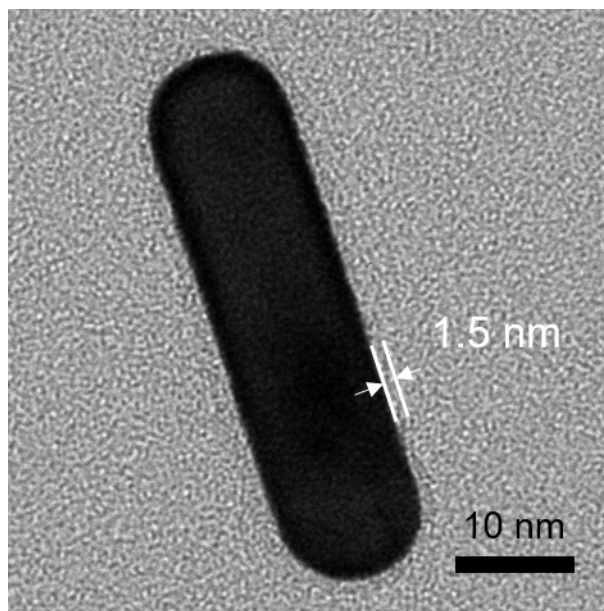

**Figure S3** TEM image of GNR@Alg-Cys. A shell of Alg-Cys with 1.5 nm in thickness was observed on the GNR.

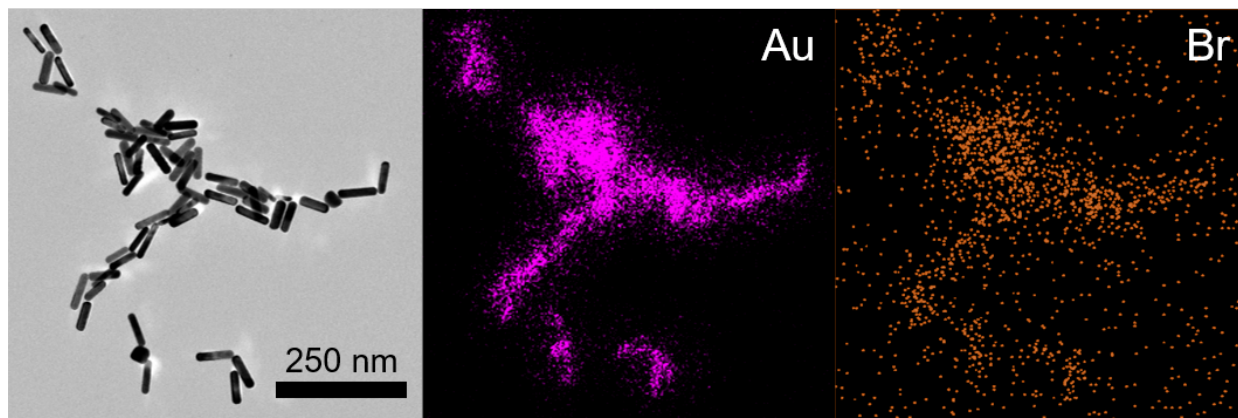

**Figure S4.** Element distribution of Au, Br on GNR@CTAB observed with TEM-EDX.

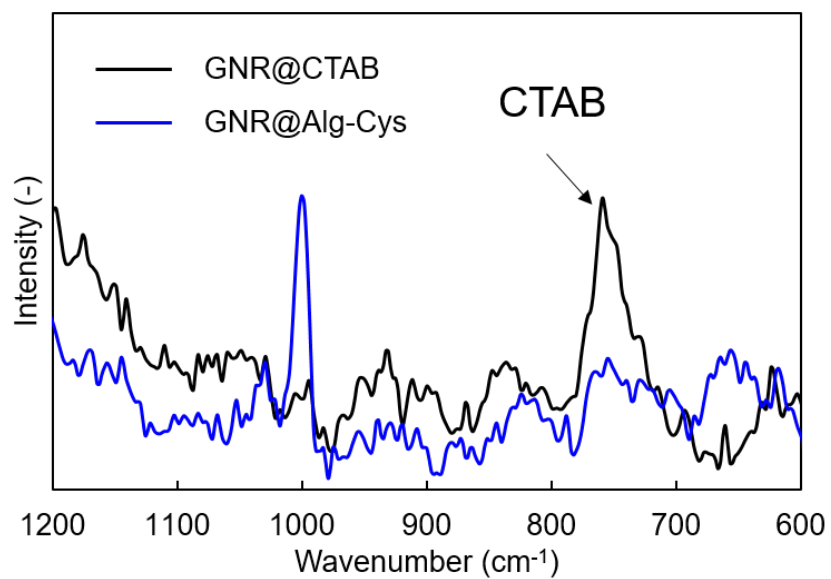

**Figure S5.** Raman spectrum of GNR@CTAB and GNR@Alg-Cys.

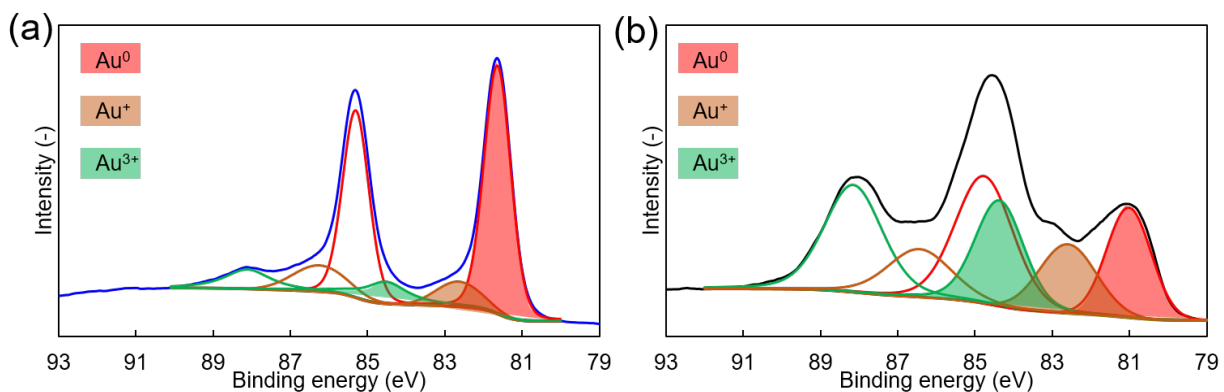

**Figure S6.** Integration area of Au<sup>0</sup> (red), Au<sup>+</sup> (brown), and Au<sup>3+</sup> (green) state in (a) GNR@CTAB and (b) GNR@Alg-Cys.

**Table S2** Summary of state of gold in GNR@CTAB and GNR@Alg-Cys.

|             | Atom percentage (%)* |                 |                  |
|-------------|----------------------|-----------------|------------------|
|             | Au <sup>0</sup>      | Au <sup>+</sup> | Au <sup>3+</sup> |
| GNR@CTAB    | 73.6                 | 11.8            | 14.6             |
| GNR@Alg-Cys | 34.1                 | 27.3            | 38.6             |

\*: The atom percentage of each state is calculated by integration of the area of each state in XPS spectrum (Figure 2d and Figure S6)

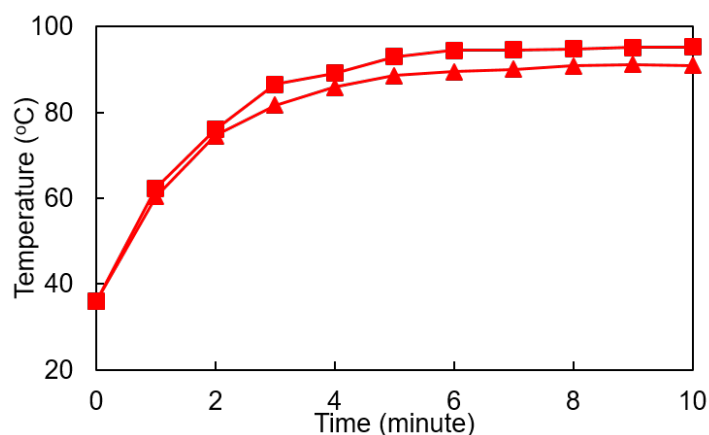

**Figure S7.** Time-dependent temperature profile of GNR@CTAB-containing PBS irradiated with diode laser (808 nm). Square stain represents the intensity of laser at 2 W/cm<sup>2</sup>. Triangular stain represents the intensity of laser at 1.5 W/cm<sup>2</sup>.
